# Supplementary material
Source: PubMed Central journal article supplement (PMC2084302)
Supplement: pnas_0709193104_3.pdf [file pnas_0709193104_3.pdf]

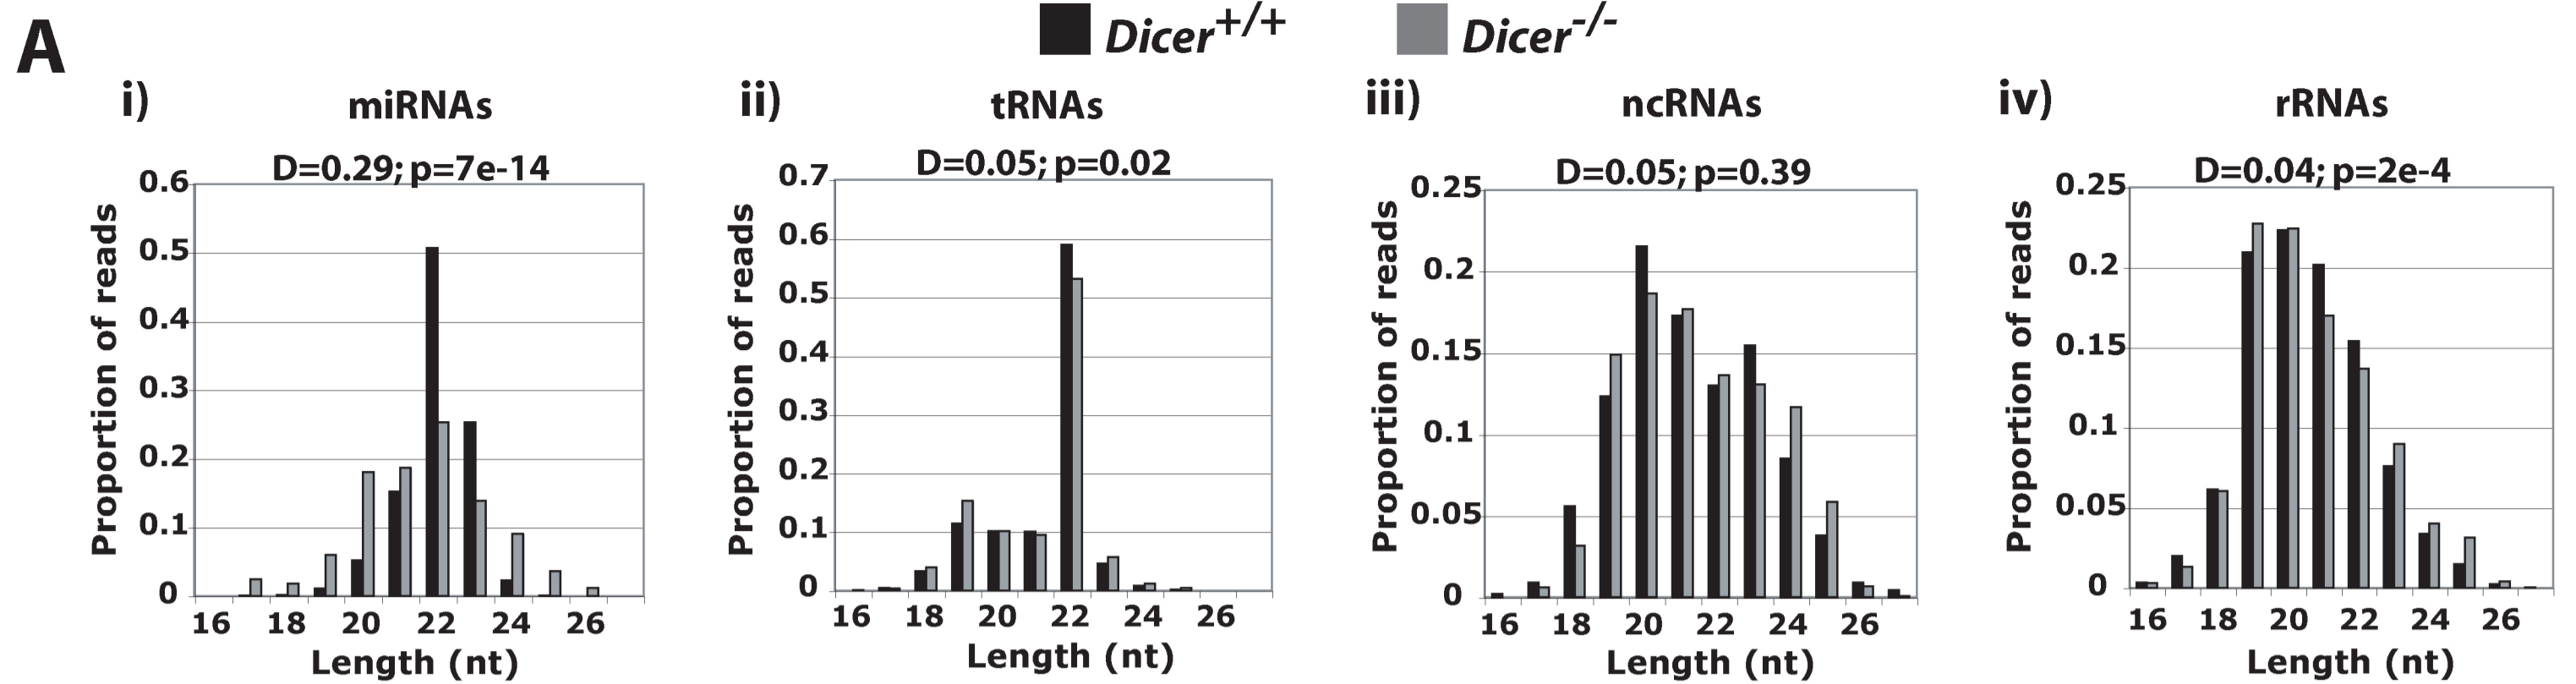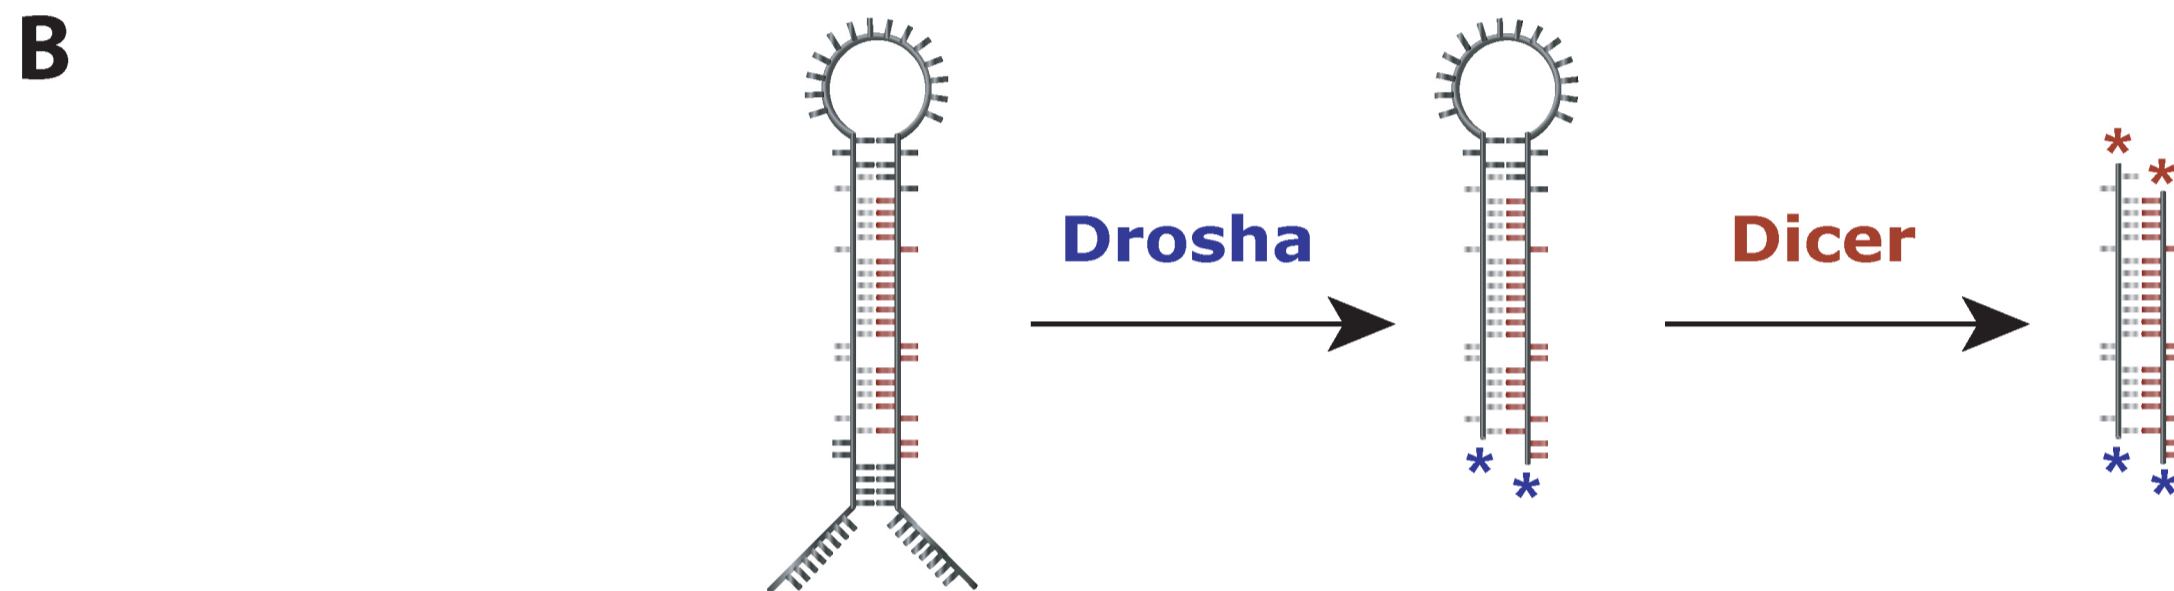

\* = 5p arm of pre-miRNA: **Drosha** defined 5' end, **Dicer** defined 3' end

\* = 3p arm of pre-miRNA: **Dicer** defined 5' end, **Drosha** defined 3' end

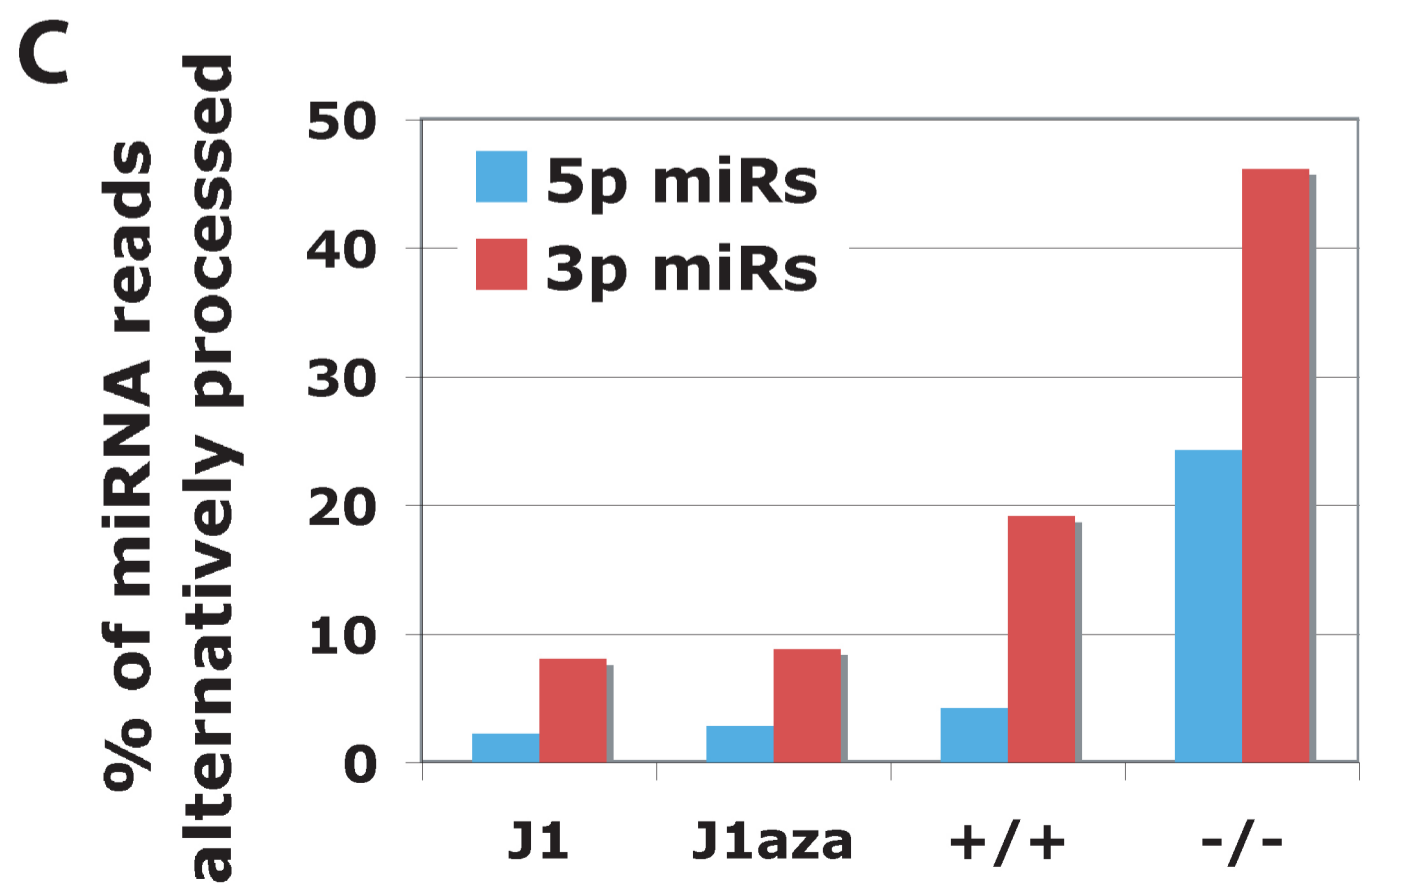

**(5' ends of miRNA reads)**

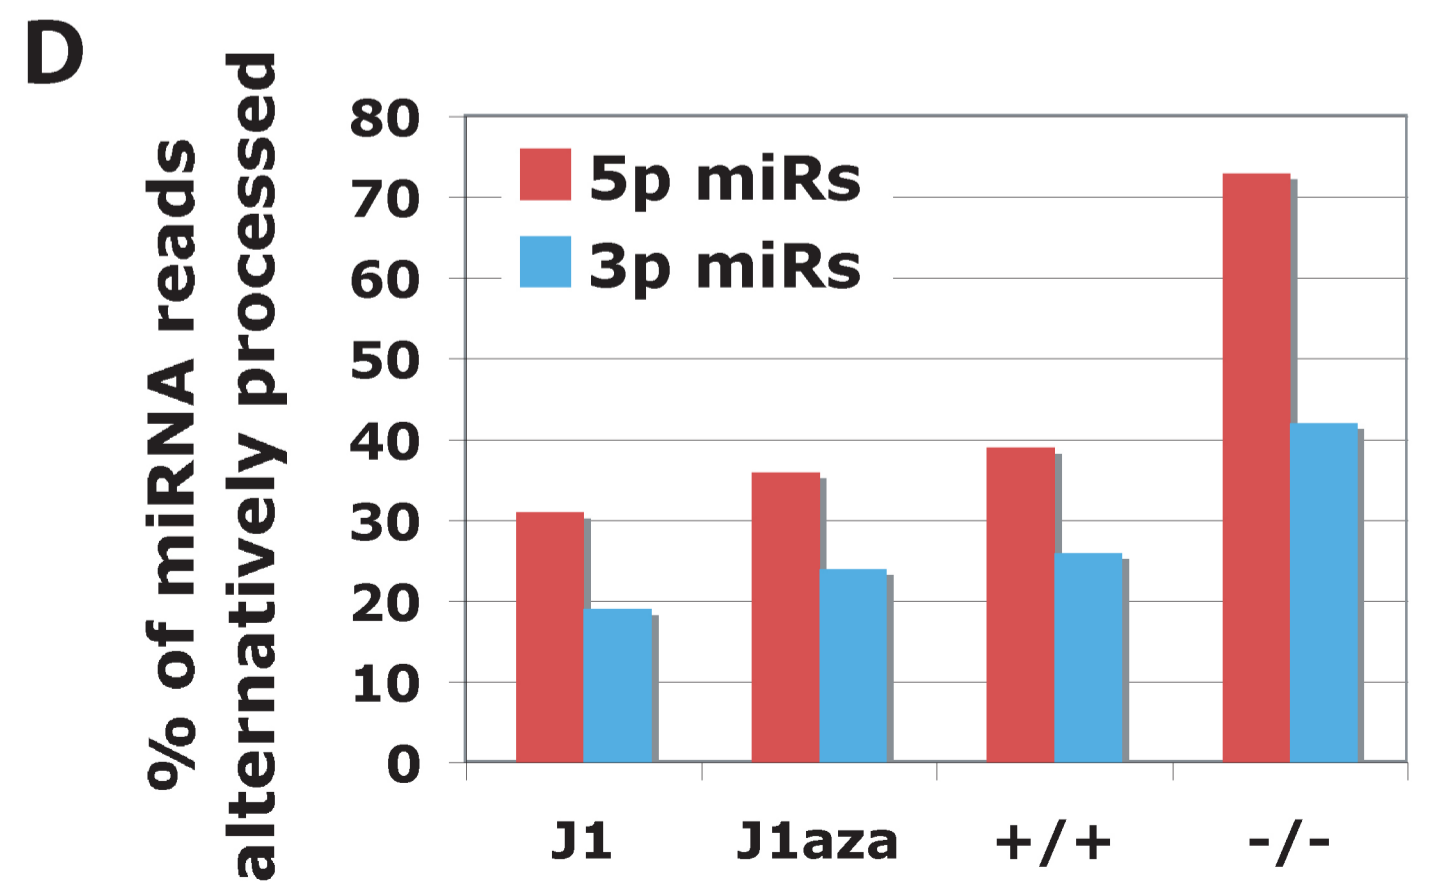

**(3' ends of miRNA reads)**
