# Supplementary material
Source: PubMed Central journal article supplement (PMC2084302)

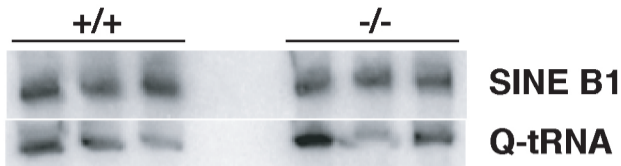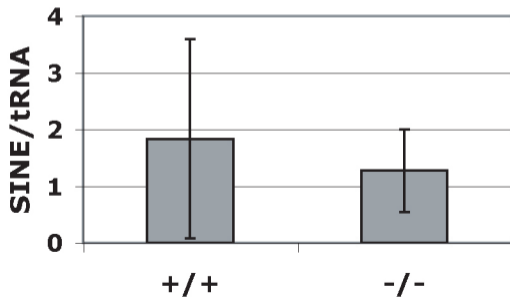

Supplement: pnas_0709193104_4.pdf [file pnas_0709193104_4.pdf]
