# Supplementary material
Source: PubMed Central journal article supplement (PMC2084302)

**Proportion of novel sequences**

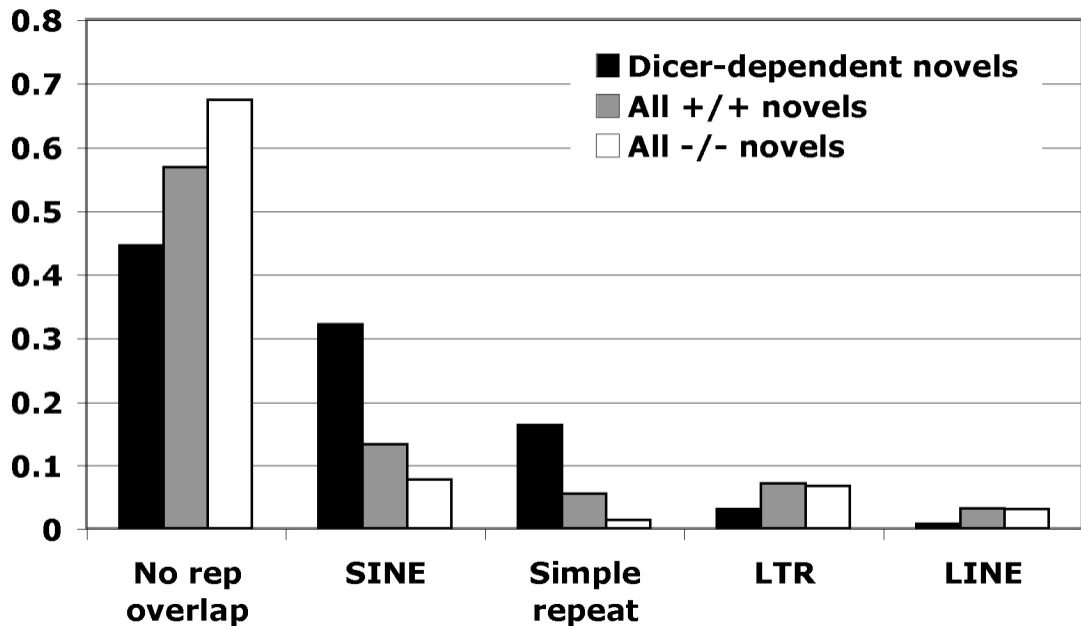

Supplement: pnas_0709193104_5.pdf [file pnas_0709193104_5.pdf]
