# Supplementary material
Source: PubMed Central journal article supplement (PMC2084302)

**A**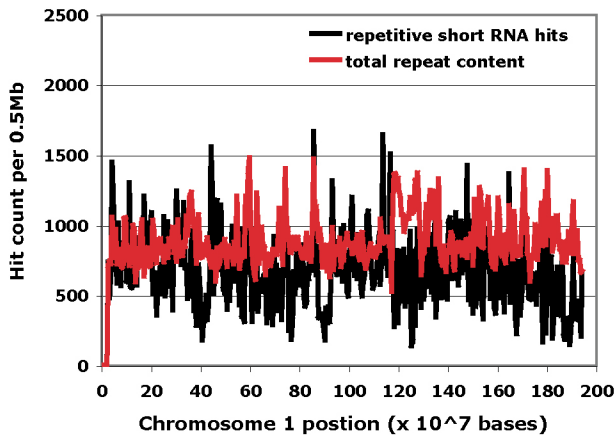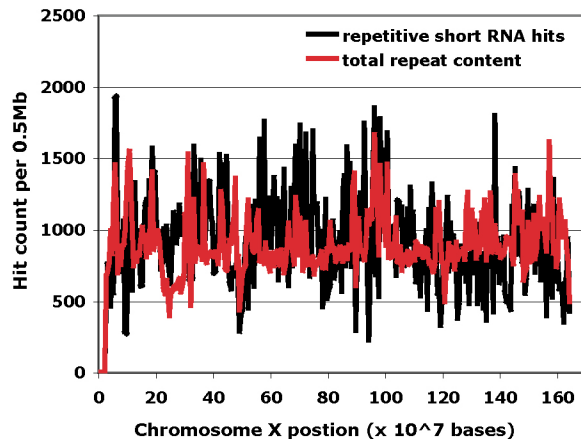**B**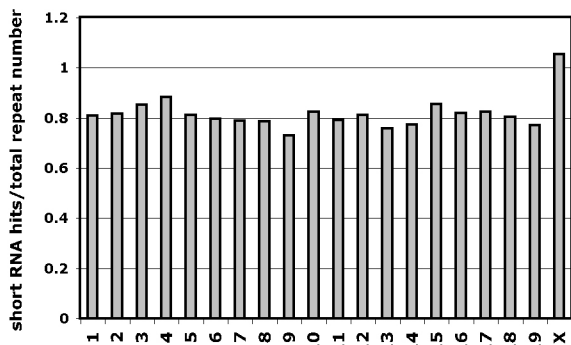**C**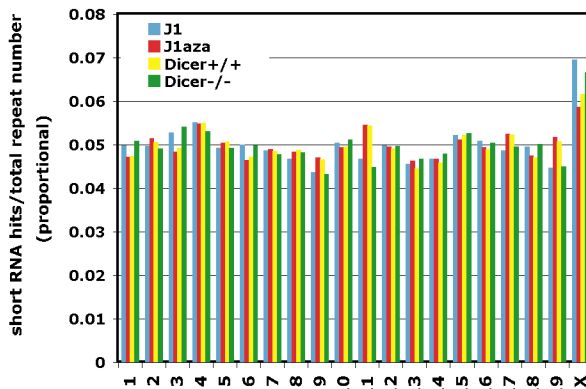**D**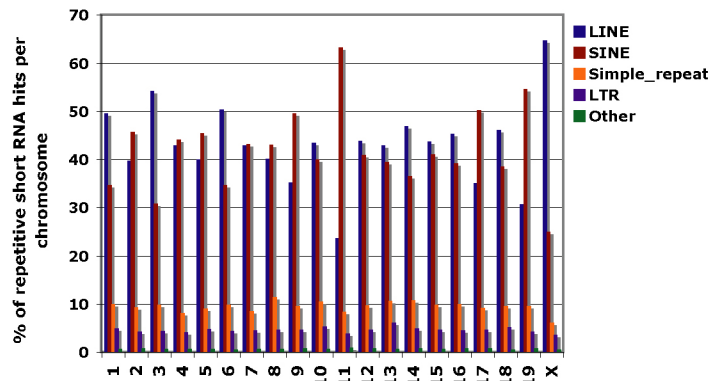**E**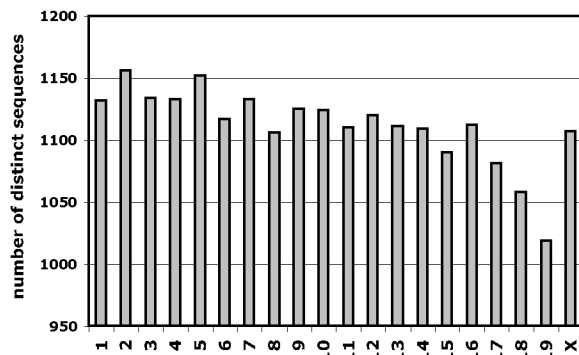

Supplement: pnas_0709193104_7.pdf [file pnas_0709193104_7.pdf]
